# Supplementary material for: Water in biodegradable glucose–water–urea deep eutectic solvent: modifications of structure and dynamics in a crowded environment
Source: Royal Society of Chemistry journal article supplement (doi:10.1039/d1cp00734c), 2021-01-01
Supplement: d1cp00734c1.pdf [file d1cp00734c1.pdf]

Electronic supplementary information

for

**Glucose-Water-Urea Deep Eutectics: How Water Structure and Dynamics  
Alters in a Crowded Environment**

Atanu Baksi, Juriti Rajbangshi and Ranjit Biswas\*

Department of Chemical, Biological and Macromolecular Sciences, S. N. Bose National  
Centre for Basic Sciences, JD Block, Sector-III, Salt Lake, Kolkata 700106, INDIA.

---

\* Address for correspondence: [ranjit@bose.res.in](mailto:ranjit@bose.res.in); phone: +91 33 2335 5706; FAX: +91 33 2335 3477

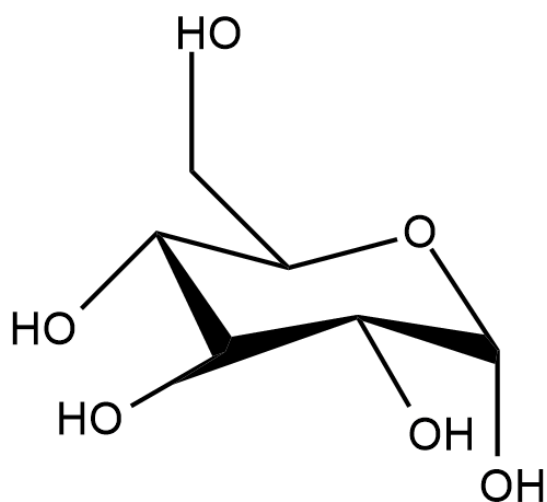

Scheme S1: Schematic representation of chair form of glucose molecule employed in the present simulation study.

---

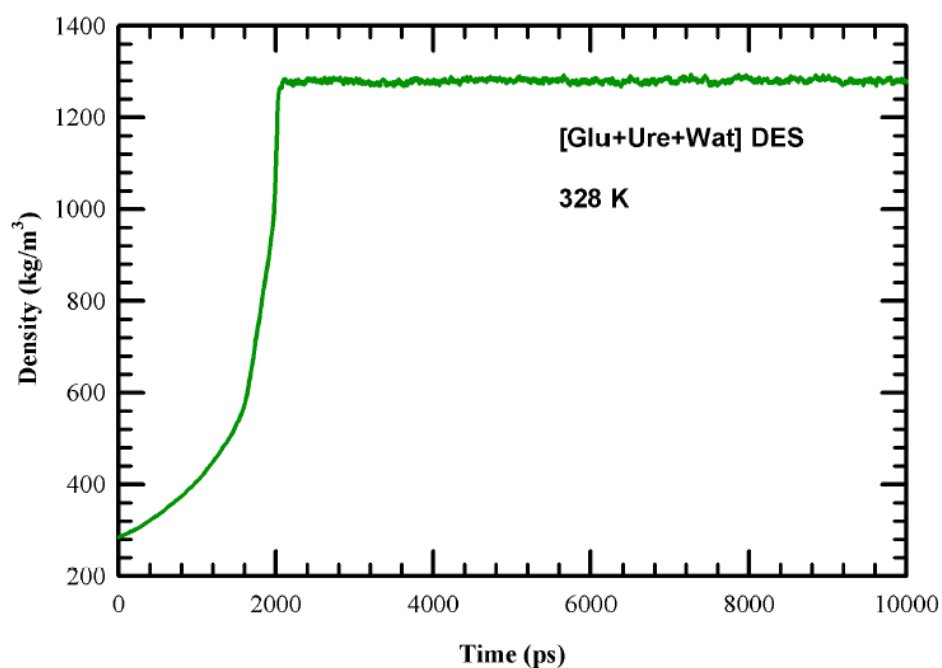

Figure S1: Time evolution of density of the [Glu+Ure+wat] DES during 10 ns NPT simulation run at a temperature 328 K.

---

Table S1: Atomic charges and non-bonded parameters for glucose molecule.

| <b>atom</b> | <b>charge</b> | <b><math>\sigma</math> (nm)</b> | <b><math>\epsilon_i</math> (kJ/mol)</b> |
|-------------|---------------|---------------------------------|-----------------------------------------|
| H00         | 0.4166        | 0.00                            | 0.00                                    |
| O01         | -0.6744       | 0.312                           | 0.711                                   |
| C02         | 0.1208        | 0.35                            | 0.276                                   |
| H03         | 0.1187        | 0.25                            | 0.1255                                  |
| H04         | 0.1187        | 0.25                            | 0.1255                                  |
| C05         | 0.0342        | 0.35                            | 0.276                                   |
| H06         | 0.118         | 0.25                            | 0.1255                                  |
| C07         | 0.141         | 0.35                            | 0.276                                   |
| H08         | 0.1292        | 0.25                            | 0.1255                                  |
| O09         | -0.6712       | 0.312                           | 0.711                                   |
| H0A         | 0.4349        | 0.00                            | 0.00                                    |
| C0B         | 0.1285        | 0.35                            | 0.276                                   |
| H0C         | 0.1117        | 0.25                            | 0.1255                                  |
| O0D         | -0.6833       | 0.312                           | 0.711                                   |
| H0E         | 0.4339        | 0.00                            | 0.00                                    |
| C0F         | 0.0638        | 0.35                            | 0.276                                   |
| H0G         | 0.1122        | 0.25                            | 0.1255                                  |
| O0H         | -0.6758       | 0.312                           | 0.711                                   |
| H0I         | 0.4287        | 0.00                            | 0.00                                    |
| C0J         | 0.207         | 0.35                            | 0.276                                   |
| O0K         | -0.4255       | 0.29                            | 0.5857                                  |
| H0M         | 0.1409        | 0.25                            | 0.1255                                  |
| O0N         | -0.5498       | 0.312                           | 0.711                                   |
| H0O         | 0.4212        | 0.0                             | 0.0                                     |

Table S2: Atomic charges and non-bonded parameters for SPC/E water molecule.

| Atom name | charge  | $\sigma$ (nm) | $\epsilon_i$ (kJ/mol) |
|-----------|---------|---------------|-----------------------|
| OW        | -0.8476 | 0.316         | 0.65                  |
| HW        | 0.4238  | 0.000         | 0.00                  |

Table S3: Atomic charges and non-bonded parameters for urea molecule.

| Atom name | charge | $\sigma$ (nm) | $\epsilon_i$ (kJ/mol) |
|-----------|--------|---------------|-----------------------|
| C         | 0.124  | 0.375         | 0.65898               |
| O         | -0.322 | 0.296         | 1.31796               |
| N         | -0.453 | 0.355         | 1.06692               |
| HT        | 0.276  | 0.000         | 0.00000               |
| HC        | 0.276  | 0.000         | 0.00000               |

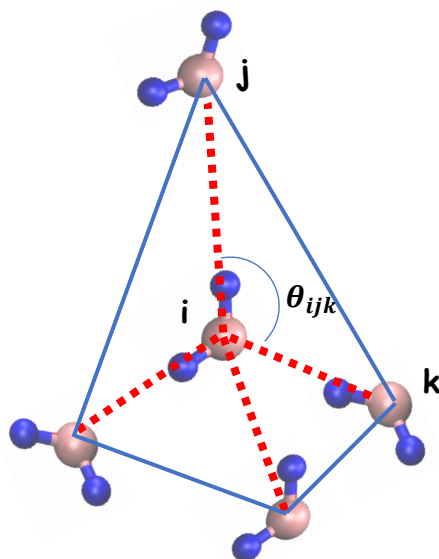

Scheme S2: Schematic representation of water tetrahedral hydrogen bond arrangement. Nearest neighbour water-water-water angle is shown.

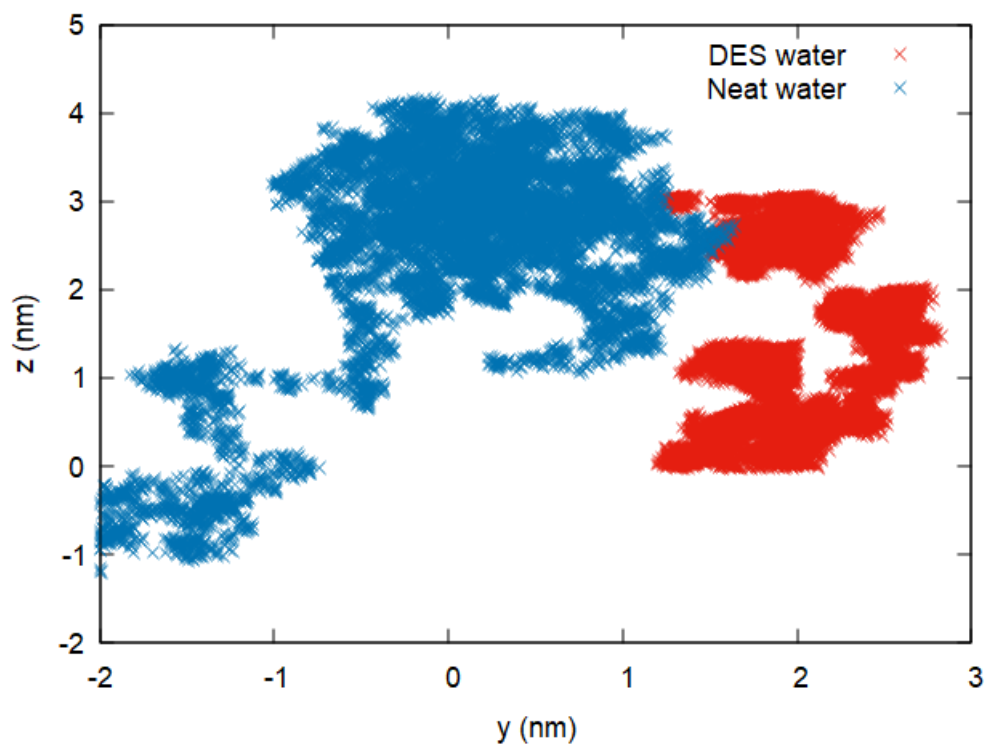

Figure S2: Two-dimensional translational trajectory plot of one random water over 5 ns timespan. Red represent trajectory for DES water while the blue points represent neat water.

Table S4: Multi-exponential fit parameters for continuous water-water H-bond relaxation ( $S_{HB}(t)$ ) in this (glucose+urea+water) DES and in neat water. All the continuous H-bond relaxation functions have been fitted to the equation  $f(t) = \sum_{i=1}^n [a_i e^{-\frac{t}{\tau_i}}]$ .

| $S_{HB}(t)$        | $a_1$  | $\tau_1$ (ps) | $a_2$  | $\tau_2$ (ps) | $a_3$ | $\tau_3$ (ps) | $\langle \tau_S^{HB} \rangle$<br>(ps) |
|--------------------|--------|---------------|--------|---------------|-------|---------------|---------------------------------------|
| Neat water at 328K | 0.1832 | 0.0934        | 0.8027 | 0.4913        | ----- | -----         | 0.417                                 |
| Water in DES       | 0.1505 | 0.0827        | 0.528  | 0.529         | 0.322 | 1.629         | 0.816                                 |

Table S5: Multi-exponential fit parameters for structural water-water H-bond relaxation ( $C_{HB}(t)$ ) in this (glucose+urea+water) DES and in neat water. All the structural H-bond relaxation functions have been fitted to the equation  $f(t) = \sum_{i=1}^n [a_i e^{-\frac{t}{\tau_i}}]$ .

| $C_{HB}(t)$         | $a_1$ | $\tau_1$ (ps) | $a_2$ | $\tau_2$ (ps) | $a_3$ | $\tau_3$ (ps) | $a_4$ | $\tau_4$ (ps) | $\langle \tau_C^{HB} \rangle$<br>(ps) |
|---------------------|-------|---------------|-------|---------------|-------|---------------|-------|---------------|---------------------------------------|
| Neat water at 328 K | 0.22  | 0.32          | 0.64  | 2.98          | 0.14  | 17.92         | --    | ---           | 4.51                                  |
| Water in DES        | 0.14  | 0.264         | 0.12  | 5.32          | 0.35  | 36.63         | 0.40  | 346.60        | 137.11                                |
